# Supplementary material
Source: PubMed Central journal article supplement (PMC3285322)
Supplement: supp_M111.312298_jbc.M111.312298-1.pdf [file supp_M111.312298_jbc.M111.312298-1.pdf]

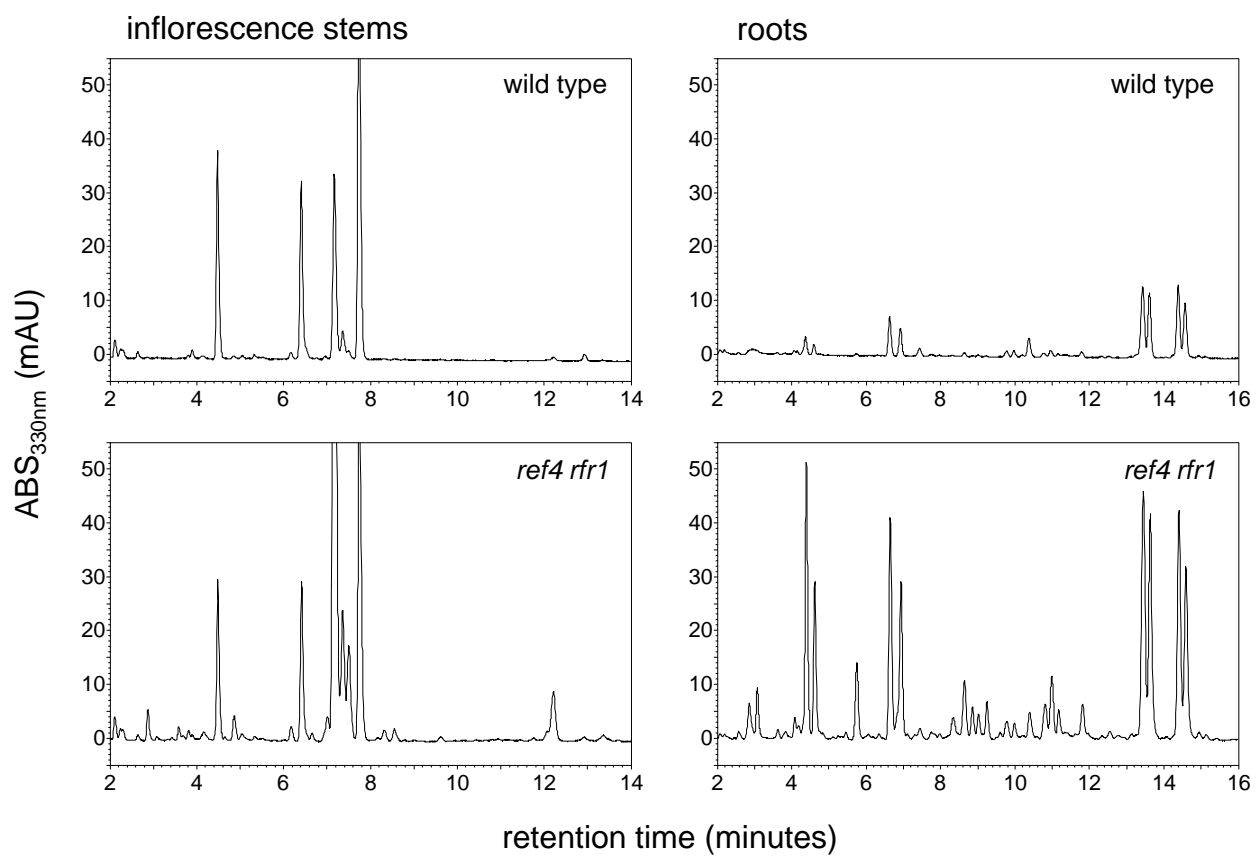

Figure S2

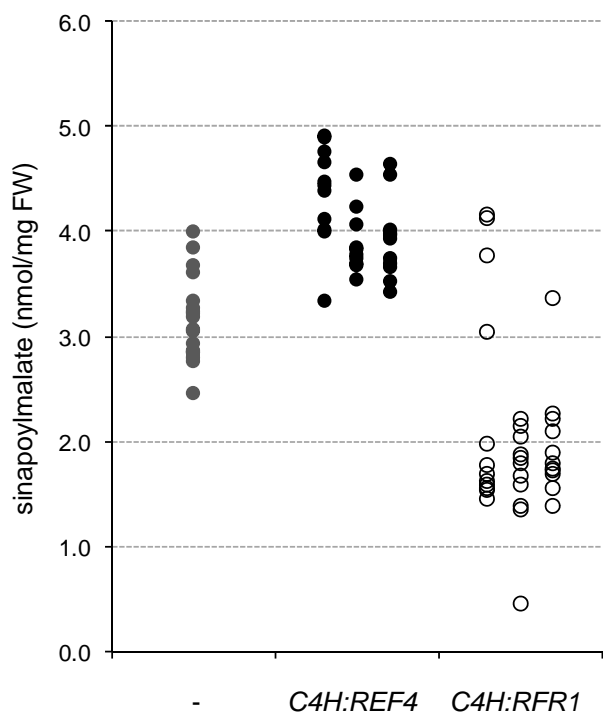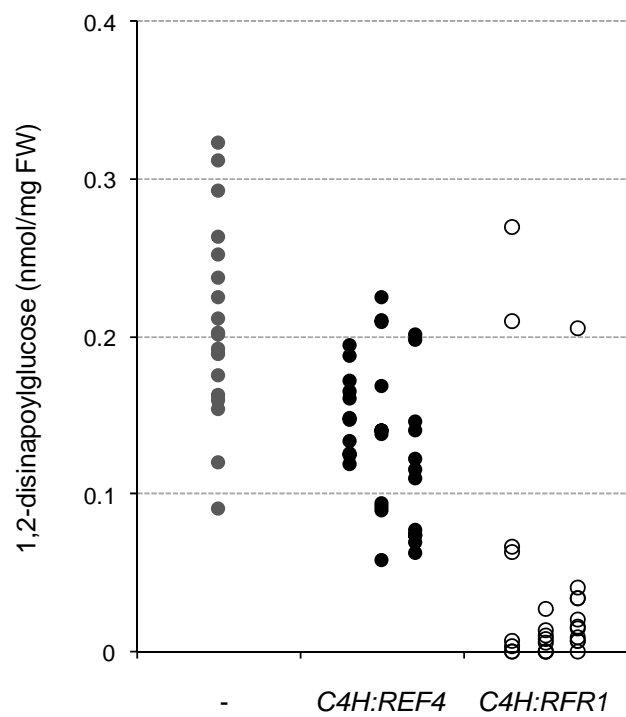

Figure S3

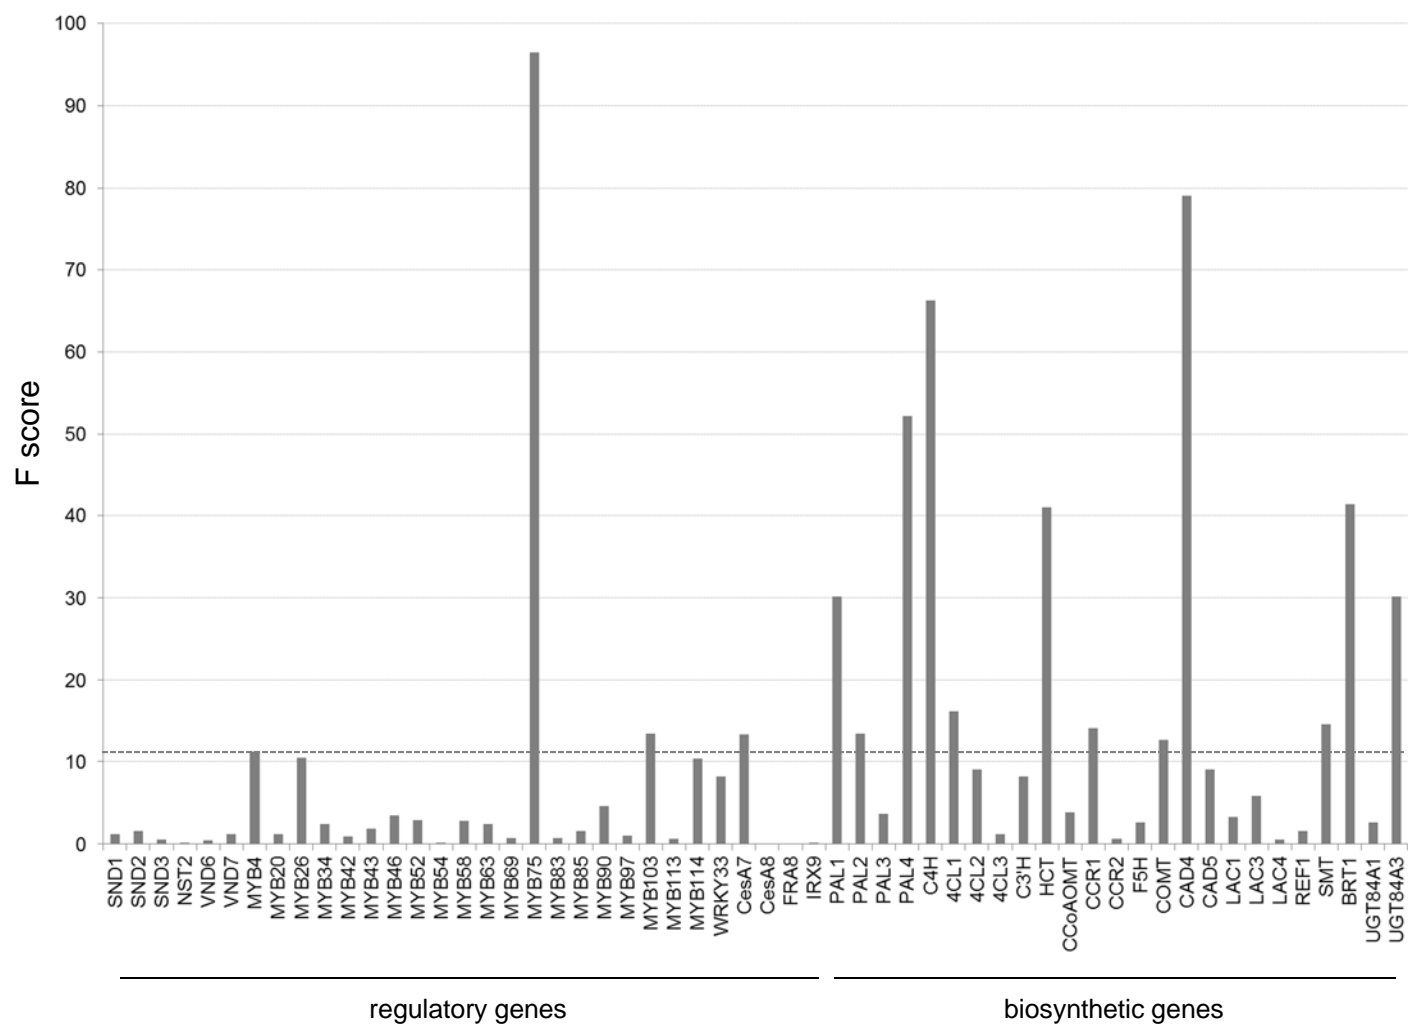

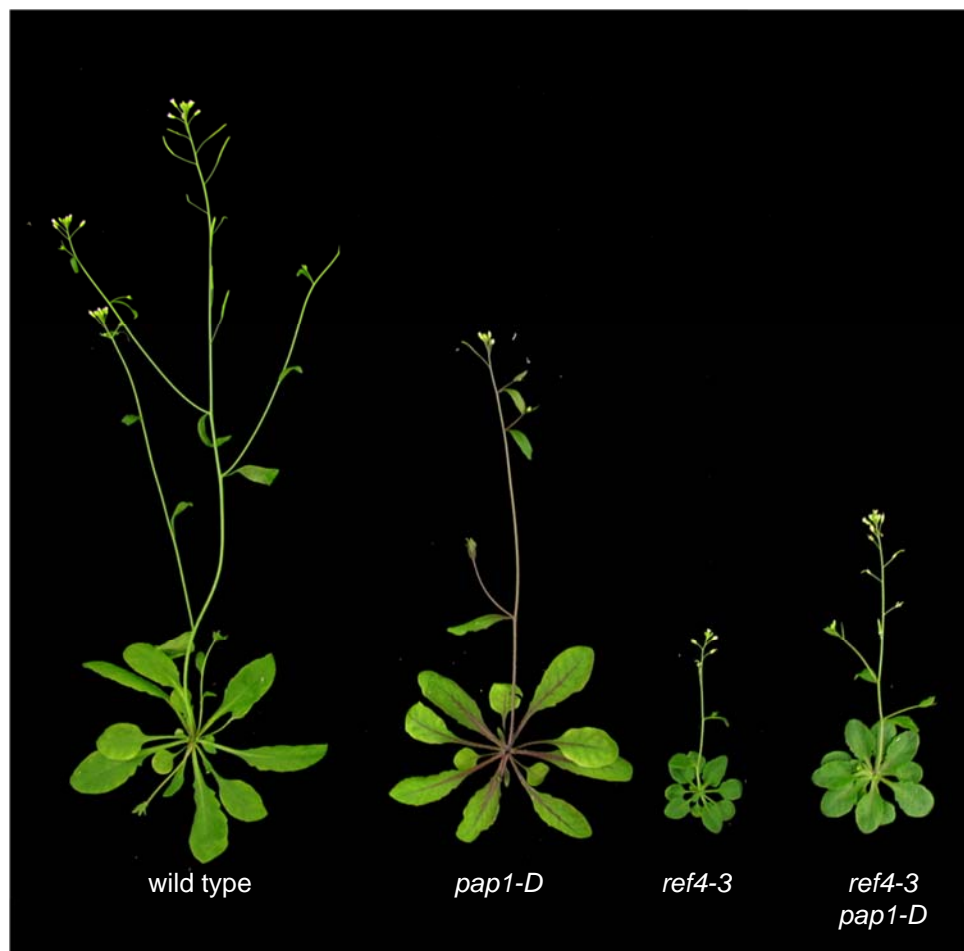

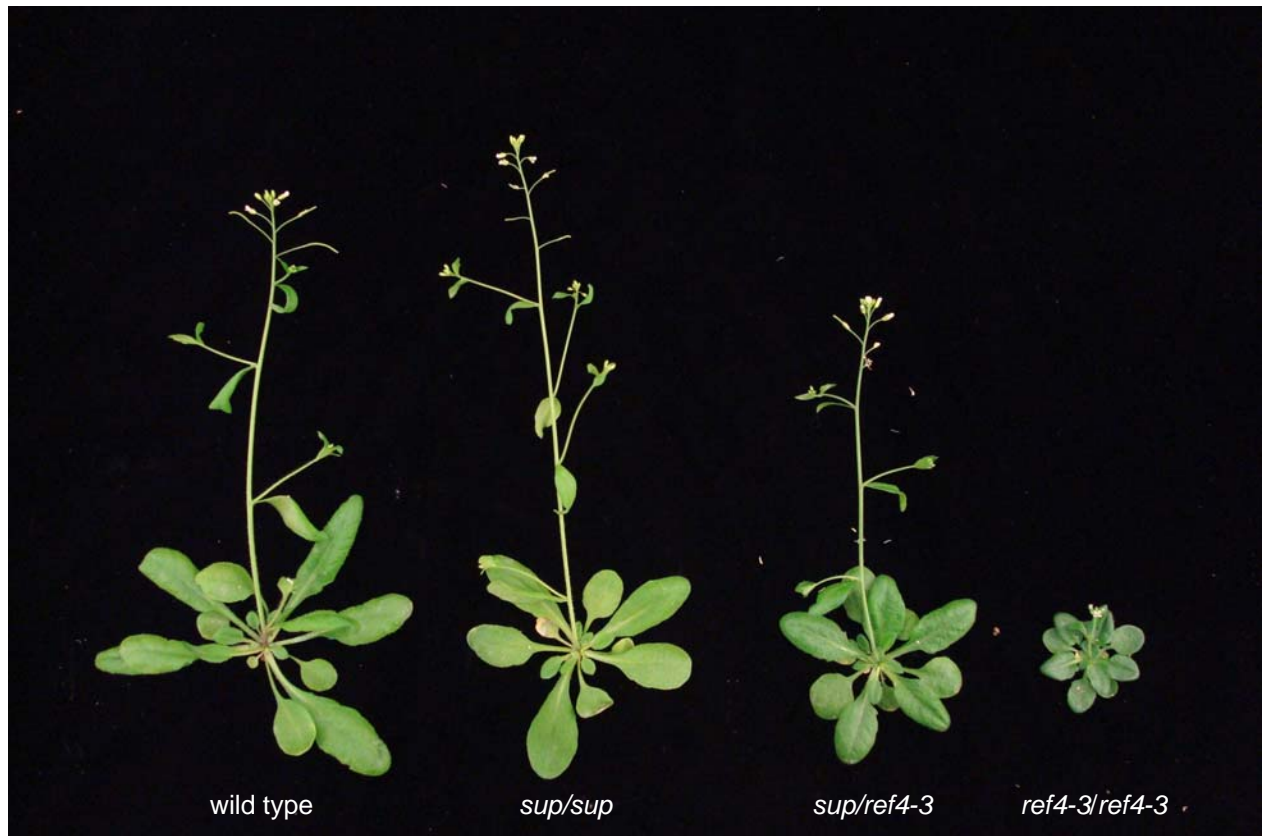

**Supplemental Table SI. REF4/RFR1/RFR2 family members used for phylogenetic analysis**

| <b>Gene</b>          | <b>Accession number</b>        | <b>Source</b> |
|----------------------|--------------------------------|---------------|
| Ppatens REF4B        | Pp1s106_135V6                  | Phytozome     |
| Ppatens REF4A        | Pp1s23_340V6.1, Pp1s23_340V6.2 | Phytozome     |
| Smoellendorffii REF4 | 168663                         | JGI           |
| Vvinifera RFR2       | XP_002264843                   | NCBI          |
| Mtruncatula RFR2     | Medtr7g080810                  | Phytozome     |
| Ppersica RFR2        | ppa017529m.g                   | Phytozome     |
| Cpapaya RFR2         | evm.TU.supercontig_60.37       | Phytozome     |
| Ptrichocarpa RFR2    | XP_002323105                   | NCBI          |
| Rcommunis RFR2       | EEF42295                       | NCBI          |
| Mesculenta RFR2      | cassava4.1_000362m.g           | Phytozome     |
| Osativa RFR2B        | EEC78956                       | NCBI          |
| Sbicolor RFR2B       | 4894134                        | JGI           |
| Zmays RFR2B          | GRMZM2G358491                  | Phytozome     |
| Osativa RFR2A        | EEC82696                       | NCBI          |
| Bdistachyon RFR2A    | Bradi1g17590                   | Phytozome     |
| Zmays RFR2A1         | GRMZM2G151983                  | Phytozome     |
| Sbicolor RFR2A       | 5052260                        | JGI           |
| Zmays RFR2A2         | GRMZM2G106790                  | Phytozome     |
| Bdistachyon REF4     | Bradi1g54150                   | Phytozome     |
| Osativa REF4         | EAZ03202                       | NCBI          |
| Sbicolor REF4        | 4746974                        | JGI           |
| Zmays REF4           | GRMZM2G150754                  | Phytozome     |
| Vvinifera REF4       | XP_002271735                   | NCBI          |
| Mguttatus REF4       | mgv1a000266m.g                 | Phytozome     |
| Ptrichocarpa REF4A   | XP_002302829                   | NCBI          |
| Ptrichocarpa REF4B   | XP_002320389                   | NCBI          |
| Rcommunis REF4       | EEF27765                       | NCBI          |
| Mesculenta REF4A     | cassava4.1_000297m.g           | Phytozome     |
| Mesculenta REF4B     | cassava4.1_000404m.g           | Phytozome     |
| Athaliana REF4       | At3g23590                      | TAIR          |
| Ppersica REF4        | ppa000301m.g                   | Phytozome     |
| GmaxREF4A            | Glyma03g30760                  | Phytozome     |
| GmaxREF4B            | Glyma05g09220                  | Phytozome     |
| GmaxREF4C            | Glyma19g00780                  | Phytozome     |
| Mguttatus RFR1       | mgv1a00297m.g                  | Phytozome     |
| Ppersica RFR1B       | ppa017778m.g                   | Phytozome     |
| Vvinifera RFR1       | XP_002277484                   | NCBI          |
| Csativus RFR1        | Cucsa.260950                   | Phytozome     |
| Ppersica RFR1A       | ppa000298m.g                   | Phytozome     |
| Gmax RFR1            | Glyma15g10970                  | Phytozome     |
| Mtruncatula RFR1     | Medtr2g026510, Medtr2g06520    | Phytozome     |
| Athaliana RFR1       | At2g48110                      | TAIR          |
| Cpapaya RFR1         | evm.TU.supercontig_16.34       | Phytozome     |
| Ptrichocarpa RFR1    | XP_002311827                   | NCBI          |
| Rcommunis RFR1       | EEF45403                       | NCBI          |
| Mesculenta RFR1A     | cassava4.1_000332m.g           | Phytozome     |
| Mesculenta RFR1B     | cassava4.1_028600m.g           | Phytozome     |

**Supplemental Table SII. Primers used in this study**

CC1446 ACGGGGCATTGATAGAAAAA  
CC1554 AGGAGGGAATCGACAATGTG  
CC1662 GCGTGGACCGCTTGCTGCAACT  
CC1776 TTGGCATTAGTGAGCAAGCA  
CC1791 CGTCACGTTCGACAGCTTAGAGGAGGAACTGAGA  
CC1792 GAGCGAATTCTATAGTTTGTGTATCCGCAATG  
CC1834 TTTTATGGGCCTCTTTCGTG  
CC1871 GATAAGCTTGGATCCCAGTCACGACGTT  
CC1872 TATCTAGAGTTTTCCCAGTCACGACGTT  
CC2206 GGGGACAAGTTTGTACAAAAAAGCAGGCTCGGTCGTCCAACAAATGG  
CC2207 GGGGACCACTTTGTACAAGAAAGCTGGGTCAAGCTAATGTTGATGGCAAG  
CC2204 GGGGACAAGTTTGTACAAAAAAGCAGGCTTCAAATGGTGGTTCCTGGAC  
CC2205 GGGGACCACTTTGTACAAGAAAGCTGGGTGCTATGAACGCAAATGAATG  
CC2946 GGGGACAAGTTTGTACAAAAAAGCAGGCTTAGGGAATATGCGTTTAGGTTTC  
CC2947 GGGGACCACTTTGTACAAGAAAGCTGGGTAGCTGTTGTTTCCTCTCAAGC  
CC3280 GGAAGCTTTCAAATTAGCAGGAAT  
CC3281 GACTAGCGCGAGACCTTCCTTA  
CC3282 ACCGGCCGTCCTAATTCC  
CC3283 GCTTCTTTCGCGGTTAGCGATTC  
CC3256 GCCACTAAGCCTTGCCTAATCA  
CC3257 CGTGGACGTCGGAGTAAGTGT  
CC3258 TCTCCTCGTGCCTCACATGA  
CC3259 TGCTTTCTGCTGGGATATCGTA  
CC2558 TAACGTGGCCAAAATGATGC  
CC2559 GTTCTCCACAACCGCTTGGT

## Supplemental Figure legends

### Supplemental Figure S1. *ref4 rfr1*-deficient plants hyperaccumulate phenylpropanoids in stems and roots.

(B) HPLC profiles of methanol soluble, UV absorbing metabolites from inflorescence stems and (C) soil-grown roots of wild-type and *ref4 rfr1* null plants.

### Supplemental Figure S2. RFR1 complements the metabolic phenotype of *ref4 rfr1*-deficient plants.

(A) Sinapoylmalate concentration in individual T2 *ref4 rfr1* plants transformed with a C4H-driven *RFR1* or *REF4* constructs. (B) 1,2-disinapoylglucose concentration of the plants in (A).

### Supplemental Figure S3. Genetic manipulation of *REF4* and *RFR1* leads to dysregulation of phenylpropanoid biosynthetic genes, but not regulatory proteins.

Expression of the indicated genes in wild-type, *ref4-3*, and *ref4 rfr1* null plants was measured by microarray (N=3 for each) and subjected to ANOVA. The y-axis shows the resulting F score for each gene, with an F score greater than 10.9 (dashed line) coinciding with a p-value less than 0.01 for an effect of *REF4/RFR1* on the expression of a given gene. The expression of phenylpropanoid regulatory genes was relatively unaffected by *REF4/RFR1*, with the exception of *MYB75 (PAP1)*, which was upregulated in the *ref4-3* mutant. Phenylpropanoid regulatory shown along the x-axis are *SND1* (At1g32770), *SND2* (At4g28500), *SND3* (At1g28470), *NST2* (At3g61910), *VND6* (At5g62380), *VND7* (At1g71930), *MYB4* (At4g38620), *MYB20* (At1g66230), *MYB26* (At3g13890), *MYB34* (At5g60890), *MYB42* (At4g12350), *MYB43* (At5g16600), *MYB46* (At5g12870), *MYB52* (At1g17950), *MYB54* (At1g73410), *MYB58* (At1g16490), *MYB63* (At1g79180), *MYB69* (At4g33450), *MYB75* (At1g56650), *MYB83* (At3g08500), *MYB85* (At4g22680), *MYB90* (At166390), *MYB97* (At4g26930), *MYB103* (At1g63910), *MYB113* (At1g66370), *MYB114* (At1g66380), *WRKY33* (At2g38470), *CesA7* (At5g17420), *CesA8* (At4g18780), *FRA8* (At2g28110), and *IRX9* (At2g37090). Phenylpropanoid biosynthetic shown are *PAL1* (At2g37040), *PAL2* (At3g53260), *PAL3* (At5g04230), *PAL4* (At3g10340), *C4H* (At2g30490), *4CL1* (At1g51680), *4CL2* (At3g21240), *4CL3* (At1g65060), *C3'H* (At2g40890), *HCT* (At5g48930), *CCoAOMT* (At4g34050), *CCR1* (At1g15950), *CCR2* (At1g80820), *F5H* (At4g36220), *COMT* (At5g54160), *CAD4* (At3g19450), *CAD5* (At4g34230), *LAC1* (At1g18140), *LAC3* (At2g30210), *LAC4* (At2g38080), *REF1* (At3g24503), *SMT* (At2g22990), *BRT1* (At3g21560), *UGT84A1* (At4g15480), and *UGT84A3* (At4g15490).

### Supplemental Figure S4. The *pap1-D* mutant allele does not induce the accumulation of anthocyanins when expressed in the *ref4-3* mutant background.

**Supplemental Figure S5. An intragenic R387H mutation rescues the dwarf phenotype of *ref4-3* mutant plants.** The plants labeled *sup/sup* and *sup/ref4-3* are homozygous and heterozygous for the intragenic suppressor allele *ref4-G383S R387H*.
